# Supplementary material for: Tuning the aspect ratio of silver nanostructures: the effect of solvent mole fraction and 4-aminothiophenol concentrationElectronic supplementary information (ESI) available: HRTEM and UV-Vis spectrum of very low aspect ratio silver nanorods and UV-Vis spectrum of 4-aminothiophenol. See http://www.rsc.org/suppdata/jm/b3/b312766b/
Source: Royal Society of Chemistry journal article supplement (doi:10.1039/b312766b), 2004-01-01
Supplement: b312766b.doc [file b312766b.doc]

**Tuning the aspect ratio of silver nanostructure: the effect of solvent mole fraction and 4-Aminothiophenol concentration**

**Jadab Sharmaa, N. K. Chakia, S. Mahima a, R. G. Gonnadeb, I. S. Mullaa and**

**K. Vijayamohanana[[1]](#footnote-2)***

a Physical Chemistry Division, b Center for Materials Characterization,

National Chemical Laboratory, Dr. Homi Bhabha Road, Pune-411008, India

**Fax: +91-020-5893044; *Tel: +91-020-5893044*;

*E-mail: [viji@ems.ncl.res.in](mailto:viji@ems.ncl.res.in)

**Electronic Supplementary Information (ESI)**

# Fig. S1


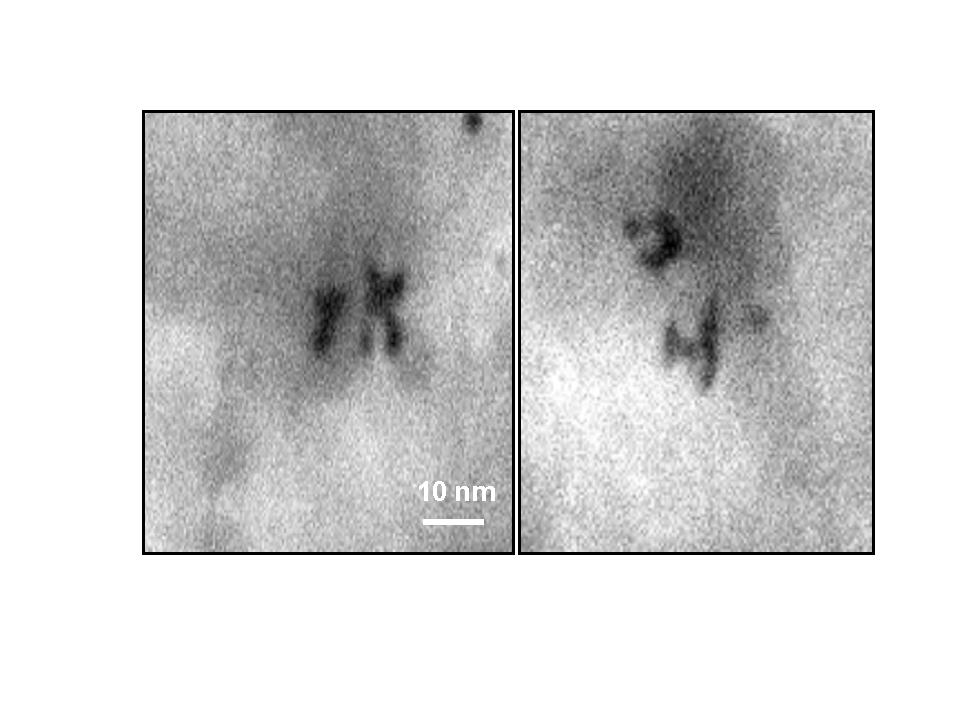


**Fig: S1** High resolution TEM images of very low aspect ratio silver nanorods recorded immediately after mixing the reactants for sample 3.

**Tuning the aspect ratio of silver nanostructure: the effect of solvent mole fraction and 4-Aminothiophenol concentration**

**Jadab Sharmaa, N. K. Chakia, S. Mahima a, R. G. Gonnadeb, I. S. Mullaa and**

**K. Vijayamohanana[[2]](#footnote-3)***

a Physical Chemistry Division, b Center for Materials Characterization,

National Chemical Laboratory, Dr. Homi Bhabha Road, Pune-411008, India

**Fax: +91-020-5893044; *Tel: +91-020-5893044*;

*E-mail: [viji@ems.ncl.res.in](mailto:viji@ems.ncl.res.in)

**Electronic Supplementary Information (ESI)**

**Fig. S2**

**
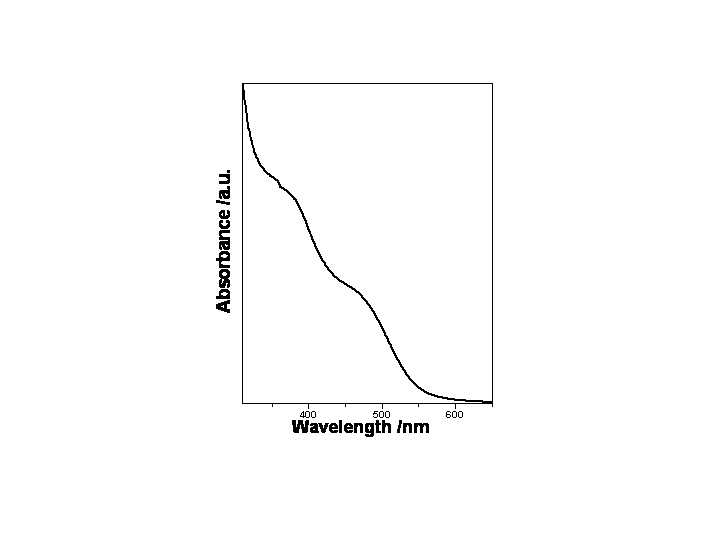
**

**Fig. S2** UV-Vis spectrum of very low aspect ratio silver nanorods recorded immediately after mixing the reactants for sample 3, which shows two peaks corresponding to the longitudinal and perpendicular oscillations of plasmon electrons.

**Tuning the aspect ratio of silver nanostructure: the effect of solvent mole fraction and 4-Aminothiophenol concentration**

**Jadab Sharmaa, N. K. Chakia, S. Mahima a, R. G. Gonnadeb, I. S. Mullaa and**

**K. Vijayamohanana[[3]](#footnote-4)***

a Physical Chemistry Division, b Center for Materials Characterization,

National Chemical Laboratory, Dr. Homi Bhabha Road, Pune-411008, India

**Fax: +91-020-5893044; *Tel: +91-020-5893044*;

*E-mail: [viji@ems.ncl.res.in](mailto:viji@ems.ncl.res.in)

**Electronic Supplementary Information (ESI)**

**Fig. S3**


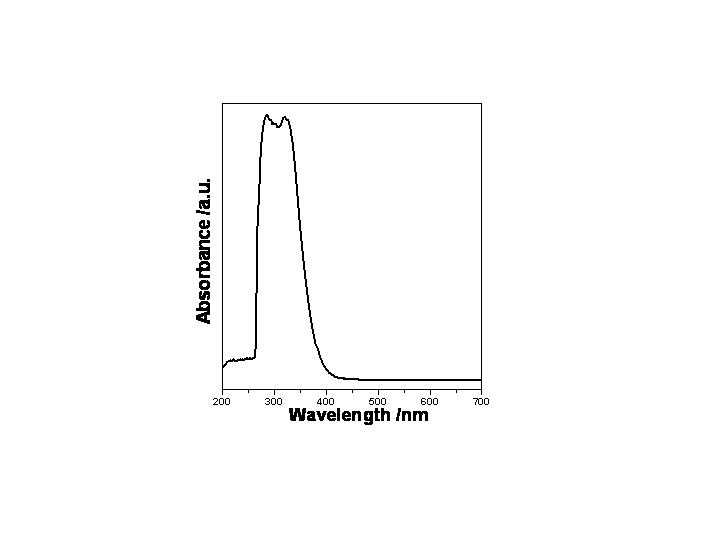


**Fig. S3** The representative UV-Vis spectrum of ATP showing the absorbance at 286-320 nm.

1. * Corresponding author [↑](#footnote-ref-2)
2. * Corresponding author [↑](#footnote-ref-3)
3. * Corresponding author [↑](#footnote-ref-4)
